# Supplementary material for: Retinal Degeneration and Microglial Dynamics in Mature Progranulin-Deficient Mice
Source: MDPI journal article supplement (doi:10.3390/ijms222111557), 2021-10-26
Supplement: s1 [file s1]

### Figure S1: Fundus images of 2 months old mice

Representative fundus color images were taken from 2 months old  $Grn^{+/+}$ ,  $Grn^{+/-}$ , and  $Grn^{-/-}$  mice.

### Figure S2: Retinal microgliosis in PGRN-deficient mice

(A) Representative immunofluorescence showing Iba-1 positive cells (red) in 6-month old  $Grn^{+/+}$  and  $Grn^{-/-}$  retinal flat mounts. Scale bar, 50  $\mu$ m. (B) Quantitative analysis of the number of Iba-1-positive cells in retinal flat mounts of  $Grn^{+/+}$  and  $Grn^{-/-}$  mice at 6 months of age ( $Grn^{+/+}$ , n = 3;  $Grn^{-/-}$ , n = 3). Data are presented as the mean  $\pm$  SEM. \*\*P < 0.01 vs.  $Grn^{+/+}$  mice (Welch's *t*-tests).
